# Supplementary material for: Identification of tri-phosphatase activity in the biogenesis of retroviral microRNAs and RNAP III-generated shRNAs
Source: PubMed Central journal article supplement (PMC4267658; doi:10.1093/nar/gku1247), 2014-11-26
Supplement: supp_gku1247_nar-02352-y-2014-File010.pdf [file supp_gku1247_nar-02352-y-2014-File010.pdf]

## Supplementary Figure S1

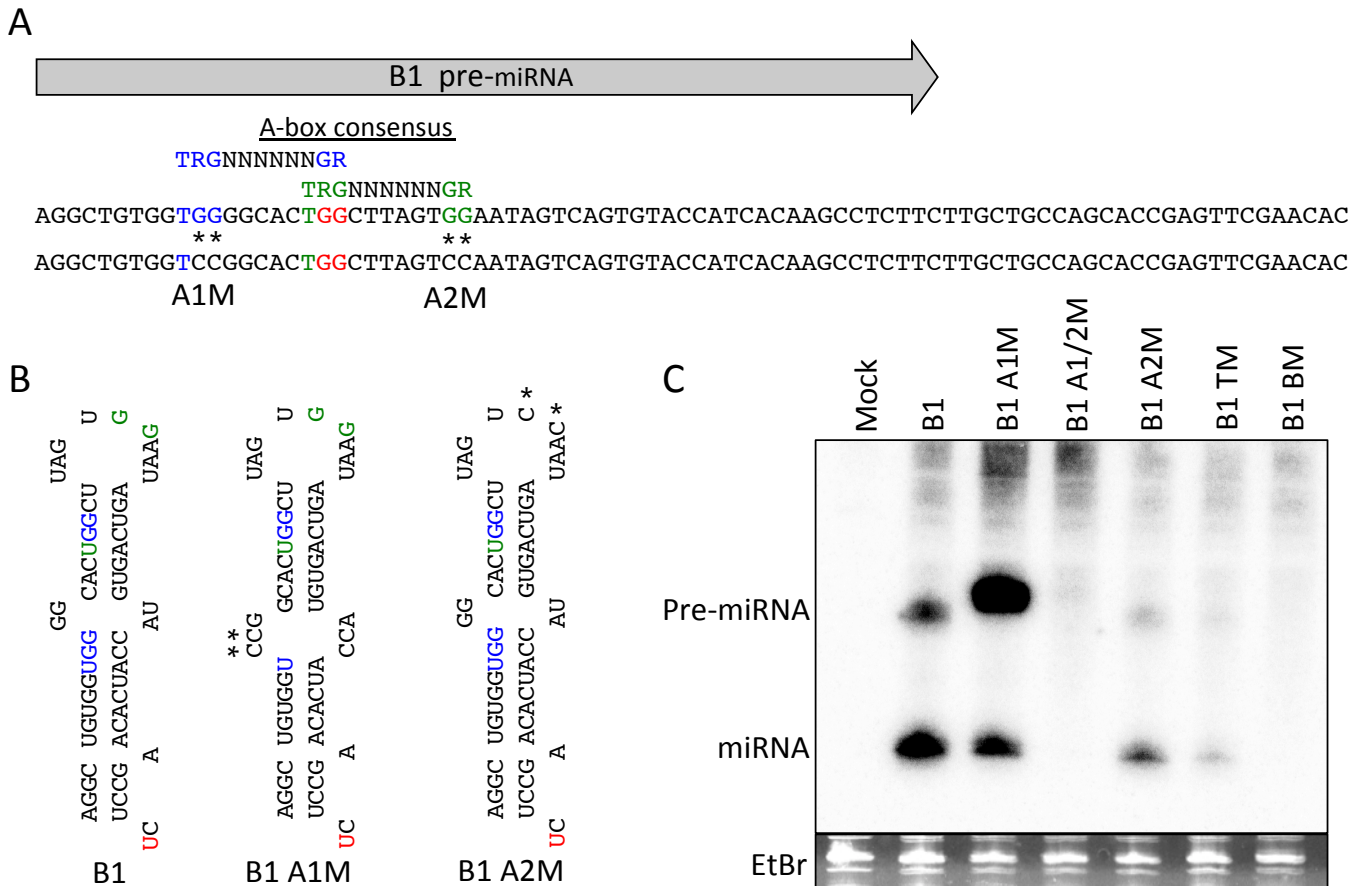

### Supplementary Figure S1. Analysis of the BLV-miR-B1 RNAP III-transcriptional elements.

(A) Schematic diagram of the overlapping A-box sequences in the BLV-miR-B1 region. The consensus sequence specific for the upstream A-box (A-box-1) is indicated by blue letters, while the consensus sequence for the downstream A-box (A-box-2) is indicated by green letters. The overlapping consensus sequence is indicated by red letters. The (\*) indicate point mutations in either A-box-1 (A1M) or A-box-2 (A2M) where indicated. (B) Predicted secondary structures of B1, B1 A1M, and B1 A2M. The (\*) indicate mutations relative to B1. (C) Northern blot analysis of HEK293T cells transfected with pBLV B1 and indicated variants.

## Supplementary Figure S2

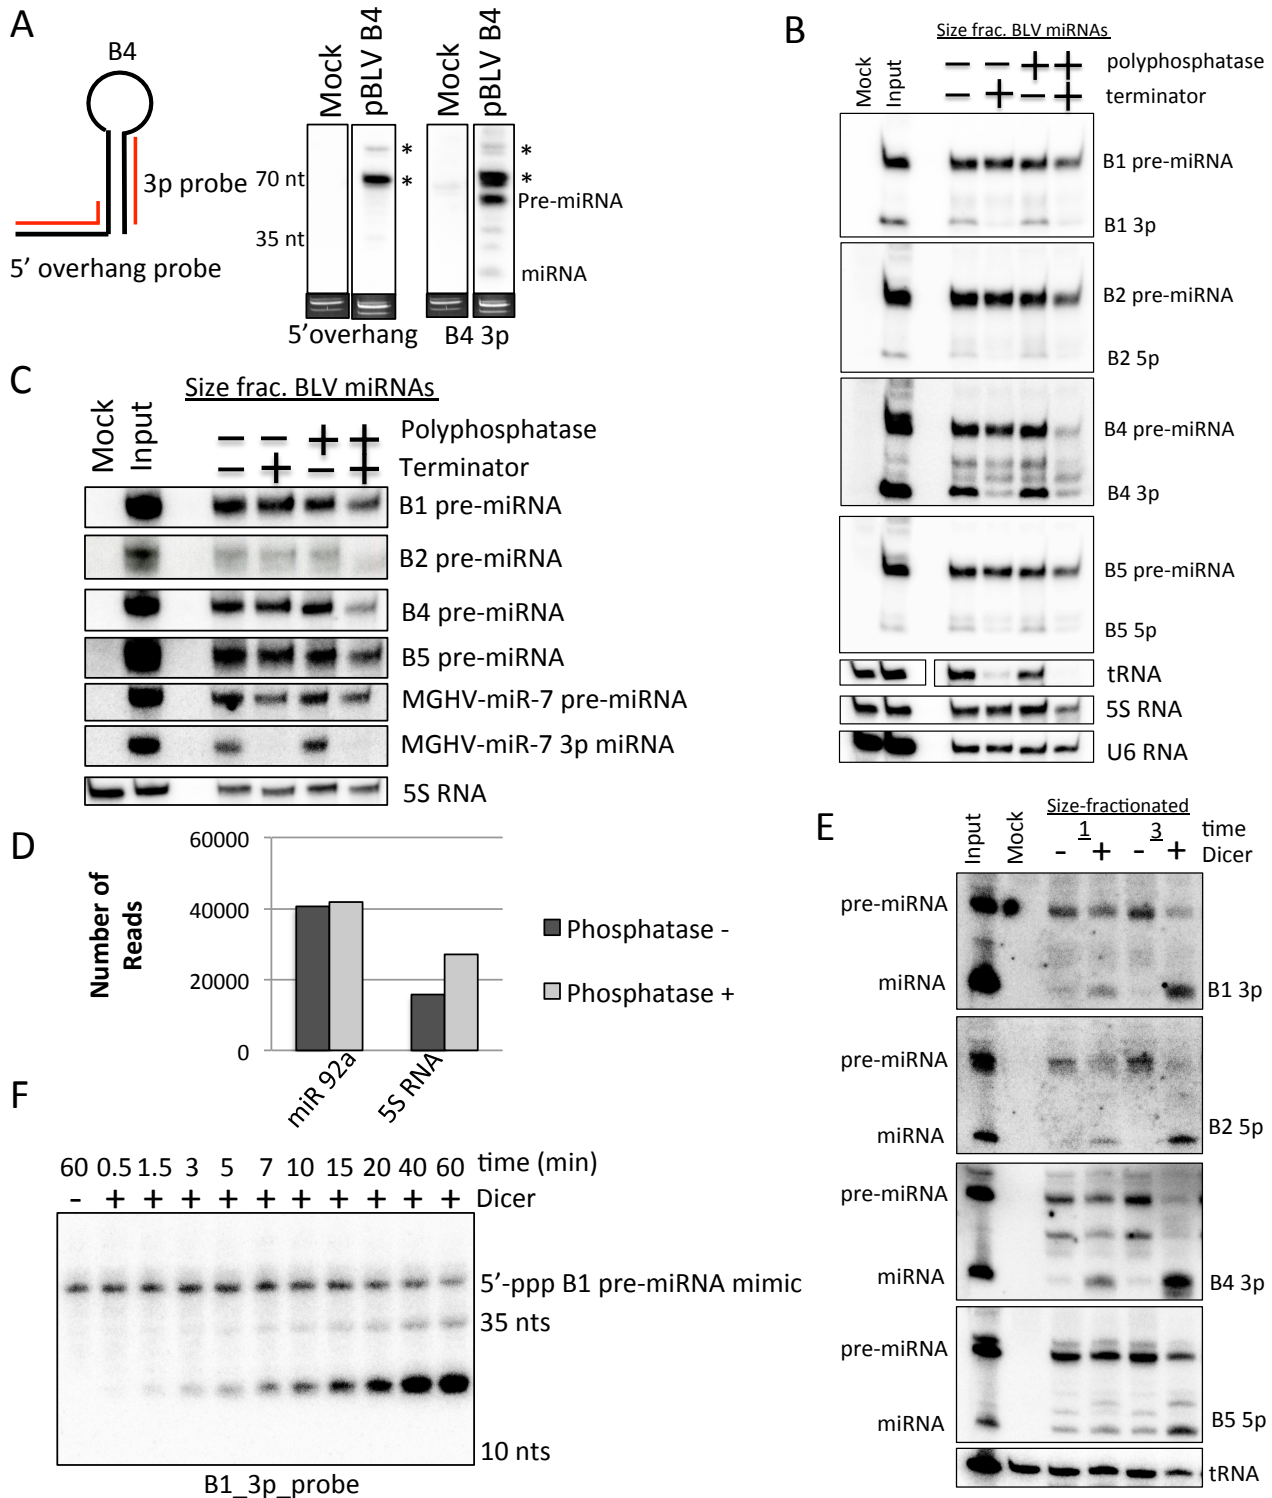

### Supplementary Figure S2. BLV pre-miRNAs are RNAP III primary transcripts

(A) Northern blot analysis of RNA purified from HEK293T cells transfected with pBLV-B4. The blot was probed with a probe complementary the 3p miRNA arm and the 5'-flanking sequence. The asterisks indicate putative primary RNAP III transcripts longer than the BLV-pre-miR-B4. (B) Wider cropped Northern blot analysis of 5'-end characterization of the BLV pre-miRNAs and miRNAs shown in Figures (4B and 5C). (C) 5'-end characterization of the BLV pre-miRNAs and the MGHV-miR-M1-7 pre- and mature- miRNA. (D) RNA seq reads of miR-92a and the 5S RNA with or without RNA 5' polyphosphatase treatment. (E) BLV pre-miRNAs were gel-purified from HEK293T cells transfected with pBLV miRNA expression vectors and incubated with (+) or without (-) Dicer for 1 or 3 hours. Northern blot analysis was performed on the the RNA and probed with the indicated probes. (F) In vitro Dicer processing of the T7-transcribed, 5'-triphosphorylated BLV-pre-miR-B1 mimic. Reactions were stopped at the indicated time points.

## Supplementary Table S1. Oligonucleotides used for cloning and Northern blot analysis

| Oligo name                     | Sequence                                                                                                                                                                                                                                                                                                                                                                                                                                                                                                                                                                                                                                          |
|--------------------------------|---------------------------------------------------------------------------------------------------------------------------------------------------------------------------------------------------------------------------------------------------------------------------------------------------------------------------------------------------------------------------------------------------------------------------------------------------------------------------------------------------------------------------------------------------------------------------------------------------------------------------------------------------|
| SV40_3p                        | GGCATGAAACAGGCA                                                                                                                                                                                                                                                                                                                                                                                                                                                                                                                                                                                                                                   |
| MGHV -M1-7-3p probe            | AATAAAGGTGGGCGCATATC                                                                                                                                                                                                                                                                                                                                                                                                                                                                                                                                                                                                                              |
| BLV_B1_3p_probe                | AGAGGCTTGATGGTACACTGA                                                                                                                                                                                                                                                                                                                                                                                                                                                                                                                                                                                                                             |
| BLV_B2_5p_probe                | TCTCTGCGCTACACTCAGTCAT                                                                                                                                                                                                                                                                                                                                                                                                                                                                                                                                                                                                                            |
| BLV_B3_3p_probe                | AGAAATCGCCCCGTACGCGTTA                                                                                                                                                                                                                                                                                                                                                                                                                                                                                                                                                                                                                            |
| BLV_B4_3p_probe                | AAAGGCGCAGAGACCGTGTGCTA                                                                                                                                                                                                                                                                                                                                                                                                                                                                                                                                                                                                                           |
| FLK_B4_3p_probe                | AAAGGCGCAGAGACTATGGTGCTA                                                                                                                                                                                                                                                                                                                                                                                                                                                                                                                                                                                                                          |
| B4_3p_probe_(s)                | AAGGCGCAGAGACTGTGGTGCTA                                                                                                                                                                                                                                                                                                                                                                                                                                                                                                                                                                                                                           |
| BLV_B5_5p_probe                | ACCTCTGAGCCACAACCTCTCT                                                                                                                                                                                                                                                                                                                                                                                                                                                                                                                                                                                                                            |
| FLK_B5_5p_probe                | ACCTCTGAGCCACAACCTCTCT                                                                                                                                                                                                                                                                                                                                                                                                                                                                                                                                                                                                                            |
| BLV_B4_5'-overhang_probe       | CTCTCGCTTAGCACAGCTGC                                                                                                                                                                                                                                                                                                                                                                                                                                                                                                                                                                                                                              |
| BLV_B1_s                       | AGTCTCGAGCCTTCGACCCCTGACACCCCGTGTTCACGCACCTCAGGCTGTGGTGGGGCACTGGCTTAGTGAATA                                                                                                                                                                                                                                                                                                                                                                                                                                                                                                                                                                       |
| BLV_B1_a                       | TACTCTAGAGCTGTTCGAACTCGGTGCTGGCAGCAAGAAGAGCCTTGATGTGTACTACTGACTATTCCTAAGCCAGTGCC                                                                                                                                                                                                                                                                                                                                                                                                                                                                                                                                                                  |
| BLV_B2_s                       | gtacCTCGAGACAGCCCTACCTGAGCCTCTCTGAGTACATGACTGAGTGTAGCGCAGAGAGGTTGCTGCTTCTGCGTGT                                                                                                                                                                                                                                                                                                                                                                                                                                                                                                                                                                   |
| BLV_B2_a                       | tgcaTCTAGAAGGCAATGGGAGGGCGCAACCCCAATCGGCTATAAAAAATGACTGAGTGACACGCAGAAAGCGACAACCT                                                                                                                                                                                                                                                                                                                                                                                                                                                                                                                                                                  |
| BLV_B3_s                       | TGACACTCGAGACGGTTAAGACCTCTCTACTTCTGCTTCACCATCCCCCTGCCAGCGTTGGTCTAGTGGAAAGAACTAA                                                                                                                                                                                                                                                                                                                                                                                                                                                                                                                                                                   |
| BLV_B3_a                       | GAACCTAGACACCAGAGCCTCTCGCTTAGCACAGCTGCAAGAAATCGCCCCGTGAGCGTTAGTTCTTCCACTAGACC                                                                                                                                                                                                                                                                                                                                                                                                                                                                                                                                                                     |
| BLV_B4_s                       | TGACACTCGAGCTGCAGCTGTGCTAAGCGAGAGGCTCTGGTGTGGGGATAAGATGCGGCCCTAGCACCA                                                                                                                                                                                                                                                                                                                                                                                                                                                                                                                                                                             |
| BLV_B4_a                       | GAACCTAGAGGCATGGGGAAGATTGCAACCCAAAAGGCGCAGAGACTGTGGTGTAGGGGCCGATCTT                                                                                                                                                                                                                                                                                                                                                                                                                                                                                                                                                                               |
| BLV_B5_s                       | CAGTCTCGAGCTGAAAATCTCAGCTCGCACCCCAAGGAAGTTGTGGCTCAGAGGTTAAAATAGCTCGGACCCGCAACCTC                                                                                                                                                                                                                                                                                                                                                                                                                                                                                                                                                                  |
| BLV_B5_a                       | GTACTCTAGATTAGGGGGCCAGAACCCGGGGCCTTGCAGGGGTGGAATAAAAAGAAAGGGAGGTTGCGGTCGCGACTAT                                                                                                                                                                                                                                                                                                                                                                                                                                                                                                                                                                   |
| B13p_RR_s                      | AGTCTCGAGAGAGGCTTGATGGTACTACTGAATCGGCTAAGAGGC                                                                                                                                                                                                                                                                                                                                                                                                                                                                                                                                                                                                     |
| B13p_RR_a                      | CATTCTAGATCAGTGTACCATCACAGCCTCTTAGCCGATTCAAGT                                                                                                                                                                                                                                                                                                                                                                                                                                                                                                                                                                                                     |
| B25p_RR_s                      | AGTCTCGAGTCTCTGCGCTACACTCAGTCATATCGGCTATCTCTG                                                                                                                                                                                                                                                                                                                                                                                                                                                                                                                                                                                                     |
| B25p_RR_a                      | CATTCTAGAATGACTGAGTGTAGCGCAGAGATAGCCGATATGACT                                                                                                                                                                                                                                                                                                                                                                                                                                                                                                                                                                                                     |
| FLK_B23p_RR_s                  | AGTCTCGAGAAAATGACTGAGCGACACGCAGAAATCGGCTAAAATGACT                                                                                                                                                                                                                                                                                                                                                                                                                                                                                                                                                                                                 |
| FLK_B23p_RR_a                  | CATGGGCCCTTAGATCTGCGTGTGCTCAGTCATTTTTAGCCGATTCT                                                                                                                                                                                                                                                                                                                                                                                                                                                                                                                                                                                                   |
| B35p_RR_s                      | AGTCTCGAGGACCAACGCTGGCAGGGGATATCGGCTAGACCAA                                                                                                                                                                                                                                                                                                                                                                                                                                                                                                                                                                                                       |
| B35p_RR_a                      | CATTCTAGAATCCCCCTGCCAGCGTTGGTCTAGCCGATATCCCC                                                                                                                                                                                                                                                                                                                                                                                                                                                                                                                                                                                                      |
| B33p_RR_s                      | AGTCTCGAGAGAAATCGCCCCCTGACGCGTTAATCGGCTAAGAAAT                                                                                                                                                                                                                                                                                                                                                                                                                                                                                                                                                                                                    |
| B33p_RR_a                      | CATTCTAGATAACGCTGACGGGGGCGATTCTTAGCCGATTAACGC                                                                                                                                                                                                                                                                                                                                                                                                                                                                                                                                                                                                     |
| B43p_RR_s                      | AGTCTCGAGGGCGCAGAGACTGTGGTGTAGGGATCGGCTAGG                                                                                                                                                                                                                                                                                                                                                                                                                                                                                                                                                                                                        |
| B43p_RR_s                      | CATTCTAGAccttagcaccacagtctctgcccTAGCCGATccc                                                                                                                                                                                                                                                                                                                                                                                                                                                                                                                                                                                                       |
| B55p_RR_s                      | AGTCTCGAGACCTCTGAGCCACAACCTTCTATCGGCTAACCTCT                                                                                                                                                                                                                                                                                                                                                                                                                                                                                                                                                                                                      |
| B55p_RR_a                      | CATTCTAGAAGGAAGTTGTGGCTCAGAGGTTAGCCGATAGGAAAG                                                                                                                                                                                                                                                                                                                                                                                                                                                                                                                                                                                                     |
| B53p_RR_s                      | AGTCTCGAGAAAGAAAGGGAGGTTGCGGTCCGAGCATCGGCTAAAA                                                                                                                                                                                                                                                                                                                                                                                                                                                                                                                                                                                                    |
| B53p_RR_a                      | CATTCTAGAGCTCGGACCCGCAACCTCCCTTTCTTTTAGCCGATGCT                                                                                                                                                                                                                                                                                                                                                                                                                                                                                                                                                                                                   |
| B4_AM2_s                       | GCTGTGCTAAGCGAGAGGCTCTGGTGTGGGGATActTGCGGCCCTAGCACCA                                                                                                                                                                                                                                                                                                                                                                                                                                                                                                                                                                                              |
| B4_AM2_a                       | TGGGGAAGATTGCAACCCAAAAGGCGCAGAGACTGTGGTGTAGGGGCCGAgag                                                                                                                                                                                                                                                                                                                                                                                                                                                                                                                                                                                             |
| B4_AM1_s                       | CTGTGCTAAGCGAGAGGCTCTGGTGTGGccATAAGATGCGGCGgCTAGCACCA                                                                                                                                                                                                                                                                                                                                                                                                                                                                                                                                                                                             |
| B4_AM1_a                       | ATGGGGAAGATTGCAACCCAAAAGGCGCAGAGACTGTGGTGTAGccCGCGATC                                                                                                                                                                                                                                                                                                                                                                                                                                                                                                                                                                                             |
| B4_BM_s                        | GCTGTGCTAAGCGAGAGGCTCTGGTGTGGGGATAAGATGCGGCCCTAGCACCA                                                                                                                                                                                                                                                                                                                                                                                                                                                                                                                                                                                             |
| B4_BM_a                        | TGGGGAAGATTGcttGCAAAAAGGCGCAGAGACTGTGGTGTAGGGGCCGATCT                                                                                                                                                                                                                                                                                                                                                                                                                                                                                                                                                                                             |
| B4_TM_s                        | CAGTCTCGAGCTCGAGCTGAGCTGTGCTAAGCGAGAGGCTCTGGTGTGGGGATAAGATGCGGCCCTAGCACCA                                                                                                                                                                                                                                                                                                                                                                                                                                                                                                                                                                         |
| B4_TM_a                        | GTACTCTAGAGCTCTAGAGGCATGGGGAAGATTGCAACCCCAAGGCGCAGAGACTGTGGTGTAGGGGCCGATCT                                                                                                                                                                                                                                                                                                                                                                                                                                                                                                                                                                        |
| universal_B4_outer_primer_s    | TAAGCTCGAGCTGCAGCTGTGCTAAGCGGAG                                                                                                                                                                                                                                                                                                                                                                                                                                                                                                                                                                                                                   |
| universal_B4_outer_primer_a    | TTGATCTAGAGGCATGGGGAAGATTCTG                                                                                                                                                                                                                                                                                                                                                                                                                                                                                                                                                                                                                      |
| universal_B1_s                 | AGTCTCGAGCCTTCGACCCCTGCCCTTGACACCCCGTGTTCACGCACCTCAGGCTG                                                                                                                                                                                                                                                                                                                                                                                                                                                                                                                                                                                          |
| B1_BM_TM_s                     | CACGCACCCCTCAGGCTGTGGTGGGGCACTGGCTTAGTGAATAG                                                                                                                                                                                                                                                                                                                                                                                                                                                                                                                                                                                                      |
| B1_BM_a                        | TACTCTAGAGGCTGTGTTGTTGCGGTGCTGGCAGCAAGAAGAGGCTTGATGTTACTACTGACTATTCCTAAGCCAGTGCC                                                                                                                                                                                                                                                                                                                                                                                                                                                                                                                                                                  |
| B1_TM_a                        | TACTCTAGAGGCTGTGTTGAACTCGGTGCTGGCAGCTTGTAGAGGCTTGATGTTACTACTGACTATTCCTAAGCCAGTGCC                                                                                                                                                                                                                                                                                                                                                                                                                                                                                                                                                                 |
| B1_A1M_s                       | TTTCACGCACCCCTCAGGCTGTGGTCCGGCACTGGCTTAGTGAATAG                                                                                                                                                                                                                                                                                                                                                                                                                                                                                                                                                                                                   |
| B1_A1M_a                       | TACTCTAGAGGCTGTGTTGAACTCGGTGCTGGCAGCAAGAAGAGGCTTGATGTTACTACTGACTATTCCTAAGCCAGTGCC                                                                                                                                                                                                                                                                                                                                                                                                                                                                                                                                                                 |
| B1_A1/2M_s                     | TTTCACGCACCCCTCAGGCTGTGGTGGGGCACTCCCTTAGTGAATAG                                                                                                                                                                                                                                                                                                                                                                                                                                                                                                                                                                                                   |
| B1_A1/2M_a                     | TACTCTAGAGGCTGTGTTGAACTCGGTGCTGGCAGCAAGAAGAGGCTTGATGTTACTACTGACTATTCCTAAGGGAGTGCC                                                                                                                                                                                                                                                                                                                                                                                                                                                                                                                                                                 |
| B1_A2M_s                       | TTTCACGCACCCCTCAGGCTGTGGTGGGGCACTGGCTTAGTCCAATAG                                                                                                                                                                                                                                                                                                                                                                                                                                                                                                                                                                                                  |
| B1_A2M_a                       | TACTCTAGAGGCTGTGTTGAACTCGGTGCTGGCAGCAAGAAGAGGCTTGATGTTACTACTGACTATTCCTAAGCCAGTGCC                                                                                                                                                                                                                                                                                                                                                                                                                                                                                                                                                                 |
| BLV913_3'UTR_TM_5'flank_s_ApaI |                                                                                                                                                                                                                                                                                                                                                                                                                                                                                                                                                                                                                                                   |
| 1                              | GGTGGTGCACTGGCTTAGTGAAT<br>CTTAGTGAATAGTCACTGTTACCATCACAAAGCCTCTGCCAGCTGCCAGCACCGAGTTGCAACACAGCCCTACCTGAGCCTCTCTGAGTGCATGAC<br>TGAGTGTAGCGCAGAGAGATTGCTGCTTCTGCGTGTGCTGCTCAGTACAGCAAAATAGCCGATTGGGGTTCGCGCCCTCCGTTGCTGTGACACAG<br>ATAAGACCTCTCTACTTCTGCTTACCATCCCCCTGCCAGCGTTGGTCTAGTGGAAAGAACTAACGCTGACGGGGCGATGCAAGCAGCTGTGCT<br>AGCGGGAGGCTCTGGTGTGGGGATAAGATATGGCCCTTAGCACCATAGTCTCTGCGCTACGGGGTTCAAATCTTCCCACGCAGCTTCCGCTTT<br>TTACGCCCTTGGCACACCCCTTAGAGATACCTGAAATCTCAGCTCGCACCTGAGGAGGGTTGTGGCTCAGAGGTTAAAATAGCTCGAGGCC<br>CAACCTCCCTTCCAGGACATT<br>TGGACCCGAGCATCCCTAGTAGAGAAATTTTGAACCTCCGTTAGGGGGCTCAGAACCCGGGGCCTTGCAGGGTGAATGTCTGGAA |
| BLV913_miRNAs_TM_gblock        |                                                                                                                                                                                                                                                                                                                                                                                                                                                                                                                                                                                                                                                   |
| BLV UTR 90 bp 3' frag as       |                                                                                                                                                                                                                                                                                                                                                                                                                                                                                                                                                                                                                                                   |

## Supplementary Table S1 cont.

| <u>Oligo name</u>               | <u>sequence</u>                                                           |
|---------------------------------|---------------------------------------------------------------------------|
| BLV913_3'UTR_TM_3'flank_a_ApaL1 | ATTGGTGCACACTTGGACCCGAGCATCC                                              |
| BLV913_3'UTR_s_sal1             | TAGAGTCGACGTCTCACTCTCACTCTCCTC                                            |
| BLV913_3'UTR_a_spe1             | ATAGACTAGTGCAAGCCAGACGCCCTT                                               |
| pRNA-U6.1-siLuc_5p_probe        | TCGAAGTACTCAGCGTAAG                                                       |
| psiRNA-hH1nEGFP-G2_5p_probe     | TGAACTTCAGGGTCAGCTTGC                                                     |
| pSUPERantiCox1_5p_probe         | AATCCTCTGGAGTGTTCTT                                                       |
| U6_probe                        | CGTTCCAATTTTAGTATATGTGCTGCC                                               |
| 5S_probe                        | CCCTGCTTAGCTCCGAGATCAGAC                                                  |
| GAPDH_sense primer              | GTCAGTGGTGGACCTGACCT                                                      |
| GAPDH_antisense primer          | CAGTTGCCATGTAGACCCCTT                                                     |
| T7-B1_pre-miRNA mimic sen       | TAATACGACTCACTATAGGGCTGTGGTGGGGCACTGGCTTAGTGGAATAGTCAGTGTACCATCACAAGCCTCT |
| T7-B1_pre-miRNA mimic antisense | AGAGGCTTGTGATGGTACACTGACTATTCACCTAAGCCAGTGCCCCACCACAGCCCTATAGTGAGTCGTATTA |



**Supplementary Table S2. RNA-seq reads mapped to the BLV miRNA loci from RNA pre-treated with (P+) or without (P-) RNA 5'-polyphosphatase**

|                                   | Sequence                                                                   | Read count (P-) | Read count (P+) | Normalized read count (P+) |
|-----------------------------------|----------------------------------------------------------------------------|-----------------|-----------------|----------------------------|
| B1 reference sequence             | CTCAGGCTGTGGTGGGGCACTGGCTTAGTGGAAATAGTCAGTGTACCATCACAAAGCCTCTTCTTGCT       |                 |                 |                            |
| B1 pre-miRNA-sized RNAs           | GCTGTGGTGGGGCACTGGCTTAGTGGAAATAGTCAGTGTACCATCACAAAGCCTCTT                  | 7               | 108             | 122                        |
|                                   | GCTGTGGTGGGGCACTGGCTTAGTGGAAATAGTCAGTGTACCATCACAAAGCCTCTTCTT               |                 | 27              | 30                         |
|                                   | GCTGTGGTGGGGCACTGGCTTAGTGGAAATAGTCAGTGTACCATCACAAAGCCTCTTCT                |                 | 21              | 24                         |
|                                   | GCTGTGGTGGGGCACTGGCTTAGTGGAAATAGTCAGTGTACCATCACAAAGCCTC                    |                 | 14              | 16                         |
|                                   | GCTGTGGTGGGGCACTGGCTTAGTGGAAATAGTCAGTGTACCATCACAAAGCCTCT                   |                 | 7               | 8                          |
|                                   | AGGCTGTGGTGGGGCACTGGCTTAGTGGAAATAGTCAGTGTACCATCACAAAGCCTCT                 | 1               | 1               | 1                          |
|                                   | GGCTGTGGTGGGGCACTGGCTTAGTGGAAATAGTCAGTGTACCATCACAAAGCCTCT                  |                 | 1               | 1                          |
|                                   | AGGCTGTGGTGGGGCACTGGCTTAGTGGAAATAGTCAGTGTACCATCACAAAGCCTCTT                | 3               |                 |                            |
|                                   | GCTGTGGTGGGGCACTGGCTTAGTGGAAATAGTCAGTGTACCATCACAAAGCCTCTTCTT               | 3               |                 |                            |
| B1_5p                             | AGGCTGTGGTGGGGCACTGGCT                                                     | 573             | 624             | 704                        |
|                                   | AGGCTGTGGTGGGGCACTGGC                                                      | 190             | 297             | 335                        |
|                                   | GCTGTGGTGGGGCACTGGCT                                                       | 6               | 17              | 19                         |
|                                   | GCTGTGGTGGGGCACTGGC                                                        | 4               | 28              | 32                         |
| B1_3p                             | TCAGTGTACCATCACAAAGCCTCT                                                   | 6843            | 6067            | 6843                       |
| B2 reference sequence             | GAGTACATGACTGAGTGTAGCGCAGAGAGGTTGTCGCTTCTGCGTGTCACTCAGTCATTTTTTATA         |                 |                 |                            |
| B2 pre-miRNA-sized RNAs           | AGTACATGACTGAGTGTAGCGCAGAGAGGTTGTCGCTTCTGCGTGTCACTCAGTCATT                 |                 | 8               | 11                         |
|                                   | ACATGACTGAGTGTAGCGCAGAGAGGTTGTCGCTTCTGCGTGTCACTCAGTCATTT                   | 5               | 6               | 9                          |
|                                   | ACATGACTGAGTGTAGCGCAGAGAGGTTGTCGCTTCTGCGTGTCACTCAGTCATTTT                  |                 | 6               | 9                          |
|                                   | ACATGACTGAGTGTAGCGCAGAGAGGTTGTCGCTTCTGCGTGTCACTCAGTCAT                     |                 | 2               | 3                          |
| B2_5p                             | ACATGACTGAGTGTAGCGCAGA                                                     | 6014            | 3606            | 5172                       |
|                                   | ATGACTGAGTGTAGCGCAGA                                                       | 737             | 431             | 618                        |
|                                   | ACATGACTGAGTGTAGCGCAG                                                      | 531             | 468             | 671                        |
| B2_3p                             | TGCGTGTCACTCAGTCATTTTT                                                     | 1202            | 838             | 1202                       |
|                                   | TGCGTGTCACTCAGTCATTTTT                                                     | 190             | 146             | 209                        |
| B4 reference sequence             | CTAAGCGAGAGGCTCTGGTGTGGGGATAAAGATGCGGCCCTTAGCACCACAGTCTCTGCGCCTTTGGGTTTC   |                 |                 |                            |
| B4 pre-miRNA-sized RNAs           | GAGAGGCTCTGGTGTGGGGATAAAGATGCGGCCCTTAGCACCACAGTCTCTGCGCCTTT                | 79              | 791             | 445                        |
|                                   | GAGAGGCTCTGGTGTGGGGATAAAGATGCGGCCCTTAGCACCACAGTCTCTGCGCCTTTT               | 36              | 297             | 167                        |
|                                   | GAGAGGCTCTGGTGTGGGGATAAAGATGCGGCCCTTAGCACCACAGTCTCTGCGCCTT                 | 5               | 50              |                            |
|                                   | GCGAGAGGCTCTGGTGTGGGGATAAAGATGCGGCCCTTAGCACCACAGTCTCTGCGCCTTT              | 3               |                 |                            |
|                                   | GAGGCTCTGGTGTGGGGATAAAGATGCGGCCCTTAGCACCACAGTCTCTGCGCCTTT                  | 3               |                 |                            |
|                                   | AGGCTCTGGTGTGGGGATAAAGATGCGGCCCTTAGCACCACAGTCTCTGCGCCTTT                   | 3               |                 |                            |
|                                   | GAGAGGCTCTGGTGTGGGGATAAAGATGCGGCCCTTAGCACCACAGTCTCTGCGCCT                  | 2               | 8               | 5                          |
|                                   | AGAGGCTCTGGTGTGGGGATAAAGATGCGGCCCTTAGCACCACAGTCTCTGCGCCTTT                 | 1               | 15              | 8                          |
|                                   | AGAGGCTCTGGTGTGGGGATAAAGATGCGGCCCTTAGCACCACAGTCTCTGCGCCTTTT                | 1               |                 | 0                          |
| B4_5p                             | AAGCGAGAGGCTCTGGTGTGG                                                      | 89              | 66              | 37                         |
|                                   | AGCGAGAGGCTCTGGTGTGG                                                       | 65              | 69              | 39                         |
|                                   | AAGCGAGAGGCTCTGGTGTGGG                                                     | 40              | 59              | 33                         |
|                                   | AGCGAGAGGCTCTGGTGTGG                                                       | 36              |                 |                            |
|                                   | AAGCGAGAGGCTCTGGTGTGGT                                                     | 24              |                 |                            |
|                                   | GAGAGGCTCTGGTGTGGGGA                                                       | 10              | 40              | 23                         |
|                                   | GAGAGGCTCTGGTGTGGGG                                                        | 8               | 40              | 23                         |
|                                   | GAGAGGCTCTGGTGTGGG                                                         | 7               | 17              | 10                         |
|                                   | GAGAGGCTCTGGTGTGGGGAT                                                      | 5               |                 |                            |
| B4_3p                             | AGCGAGAGGCTCTGGTGTGGG                                                      |                 | 77              | 43                         |
|                                   | TAGCACCACAGTCTCTGCGCCTTT                                                   | 3132            | 5566            | 3132                       |
|                                   | TAGCACCACAGTCTCTGCGCCTT                                                    | 1596            | 2939            | 1654                       |
|                                   | TAGCACCACAGTCTCTGCGCCTTTT                                                  | 389             | 645             | 363                        |
|                                   | TAGCACCACAGTCTCTGCGCCT                                                     | 253             | 475             | 267                        |
| B5 (NC_001414) reference sequence | TCTCAGTCTCGACCCCAAGGAAGGTTGTGGCTCAGAGGTTAAAATAGTCTGGACCGCAACCTCCCTTTCTTTTT |                 |                 |                            |
| B5 pre-miRNA-sized RNAs           | AAGGAAGGTTGTGGCTCAGAGGTTAAAATAGTCTGGACCGCAACCTCCCTT                        | 170             | 502             | 758                        |
|                                   | CAAGGAAGGTTGTGGCTCAGAGGTTAAAATAGTCTGGACCGCAACCTCCCT                        | 46              | 59              | 89                         |
|                                   | CCAAGGAAGGTTGTGGCTCAGAGGTTAAAATAGTCTGGACCGCAACCTCCCT                       | 5               | 8               | 12                         |
| B5_5p                             | AAGGAAGGTTGTGGCTCAGAGGTT                                                   | 2398142         | 1240202         | 1872688                    |
|                                   | AAGGAAGGTTGTGGCTCAGAGG                                                     | 472546          | 334894          | 505685                     |
|                                   | AAGGAAGGTTGTGGCTCAGAG                                                      | 154662          | 101656          | 153499                     |
|                                   | AAGGAAGGTTGTGGCTCAGA                                                       | 141431          | 85484           | 129080                     |
|                                   | CAAGGAAGGTTGTGGCTCAGAGGTT                                                  | 11655           | 6795            | 10260                      |
|                                   | CCAAGGAAGGTTGTGGCTCAGA                                                     | 1349            | 927             | 1400                       |
|                                   | CCAAGGAAGGTTGTGGCTCAGAG                                                    | 928             | 650             | 981                        |
| B5_3p                             | CTCGGACCGCAACCTCCCTTTC                                                     | 118851          | 78710           | 118851                     |
|                                   | CTCGGACCGCAACCTCCCTTCT                                                     | 68792           | 31244           | 47178                      |
|                                   | CTCGGACCGCAACCTCCCTTT                                                      | 37693           | 18822           | 28421                      |
|                                   | CTCGGACCGCAACCTCCCTT                                                       | 3379            | 1592            | 2404                       |

**Supplementary Table S2. cont.**

|                             | Sequence                                                            | Read count (P-) | Read count (P+) | Normalized read count (P+) |
|-----------------------------|---------------------------------------------------------------------|-----------------|-----------------|----------------------------|
| B5 (913) reference sequence | GCACCTGAGGAGGGTTGTGGCTCAGAGGTTAAAAATAGCTCGGACCGCAACCTCCCTTTCTTTTATT |                 |                 |                            |
| B5_pre-miRNA                | ACCCTGAGGAGGGTTGTGGCTCAGAGGTTAAAAATAGCTCGAGCCGCAACCTCCCTT           |                 | 5               | 5                          |
|                             | ACCCTGAGGAGGGTTGTGGCTCAGAGGTTAAAAATAGCTCGAGCCGCAACCTCCCTTTC         |                 | 3               | 3                          |
|                             | GAGGGTTGTGGCTCAGAGGTTAAAAATAGCTCGAGCCGCAACCTCCCTTTCTTT              |                 | 2               | 2                          |
|                             | GAGGGTTGTGGCTCAGAGGTTAAAAATAGCTCGAGCCGCAACCTCCCTTTCTTTT             |                 | 2               | 2                          |
|                             | GAGGAGGGTTGTGGCTCAGAGGTTAAAAATAGCTCGAGCCGCAACCTCCCTT                | 1               | 2               | 2                          |
|                             | AGGAGGGTTGTGGCTCAGAGGTTAAAAATAGCTCGAGCCGCAACCTCCCTTCT               |                 | 1               | 1                          |
|                             | AGGGTTGTGGCTCAGAGGTTAAAAATAGCTCGAGCCGCAACCTCCCTT                    |                 | 1               | 1                          |
|                             | GAGGGTTGTGGCTCAGAGGTTAAAAATAGCTCGAGCCGCAACCTCCCTT                   |                 | 1               | 1                          |
|                             | CTGAGGAGGGTTGTGGCTCAGAGGTTAAAAATAGCTCGAGCCGCAACCTCCCTTCT            | 1               |                 |                            |
|                             | AGGAGGGTTGTGGCTCAGAGGTTAAAAATAGCTCGAGCCGCAACCTCCCTTTCTTT            | 1               |                 |                            |
| B5_5p                       | GAGGAGGGTTGTGGCTCAGAGGT                                             | 866             | 781             | 823                        |
|                             | GAGGAGGGTTGTGGCTCAGAGG                                              | 166             | 224             | 236                        |
|                             | GAGGAGGGTTGTGGCTCAGAGGTT                                            | 109             | 165             | 174                        |
|                             | AGGAGGGTTGTGGCTCAGAGGT                                              | 126             | 128             | 135                        |
| B5_3p                       | CTCGAGCCGCAACCTCCCTTCT                                              | 157             | 149             | 157                        |

Table S2. Small RNA sequencing read counts for BLV pre-miRNA-sized RNAs and abundant miRNA isoforms that map to the respective BLV miRNA genomic locus with (P+) or without (P-) RNA 5' polyphosphatase treatment. 5p read and pre-miRNA read counts were normalized to their respective dominant 3p miRNA isoform.
